# Supplementary material
Source: PubMed Central journal article supplement (PMC7735664)
Supplement: bi0c00800_si_001.pdf [file bi0c00800_si_001.pdf]

# Supporting Information

## Polyamines Mediate Folding of Primordial Hyperacidic Helical Proteins

Dragana Despotović<sup>1,‡,\*</sup>, Liam M. Longo<sup>1,2,3,‡</sup>, Einav Aharon<sup>1</sup>, Amit Kahana<sup>1,4</sup>, Tali Scherf<sup>5</sup>, Ita Gruic-Sovulj<sup>6</sup> and Dan S. Tawfik<sup>1,\*</sup>

<sup>1</sup>Department of Biomolecular Sciences, Weizmann Institute of Science, 7610001

Rehovot, Israel

<sup>2</sup>Earth-Life Science Institute, Tokyo Institute of Technology, 1528550 Tokyo, Japan

<sup>3</sup>Blue Marble Space Institute of Science, Seattle, 98154 Washington, USA

<sup>4</sup>Department of Molecular Genetics, Weizmann Institute of Science, 7610001 Rehovot, Israel

<sup>5</sup>Department of Chemical Research Support, Weizmann Institute of Science, 7610001 Rehovot, Israel

<sup>6</sup>Department of Chemistry, Faculty of Science, University of Zagreb, 10000 Zagreb, Croatia

<sup>‡</sup>These authors contributed equally to this work.

\*Corresponding authors: E-mail addresses: [dragana.despotovic@weizmann.ac.il](mailto:dragana.despotovic@weizmann.ac.il); [dan.tawfik@weizmann.ac.il](mailto:dan.tawfik@weizmann.ac.il)

## Supporting Figures

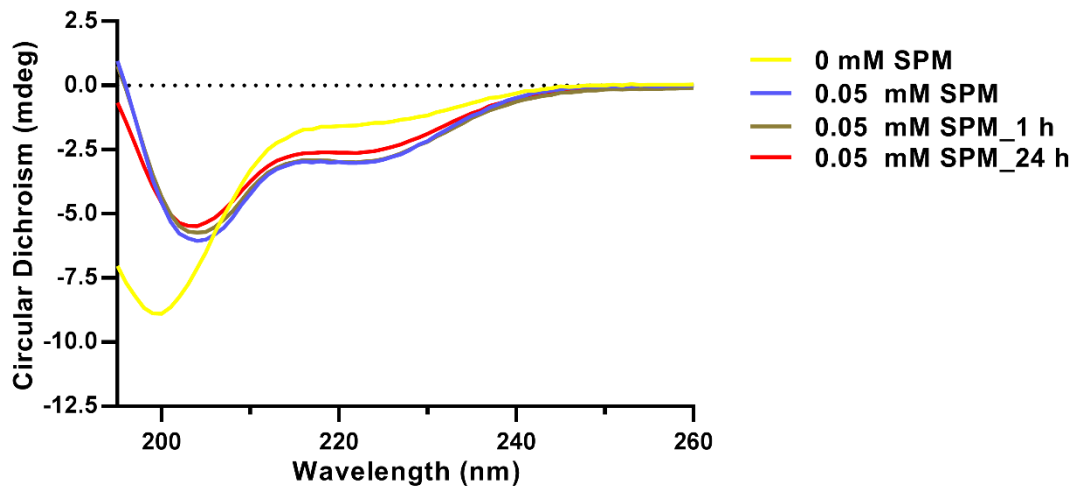

**Figure S1. Circular dichroism spectra of Acidic-(HhH)<sub>2</sub> upon incubation with spermine (SPM).** Spectra were taken immediately after addition of 0.05 mM spermine and again after 1 h and 24 h of incubation. The resulting spectra are very similar, demonstrating that for Acidic-(HhH)<sub>2</sub> polyamine-induced structure formation is very fast.

**A**

EIEEASVEELTEVPGIGPELAEEILEELAS/E  
 EIEEASVEELTEVPGIGPELAEEILEEL

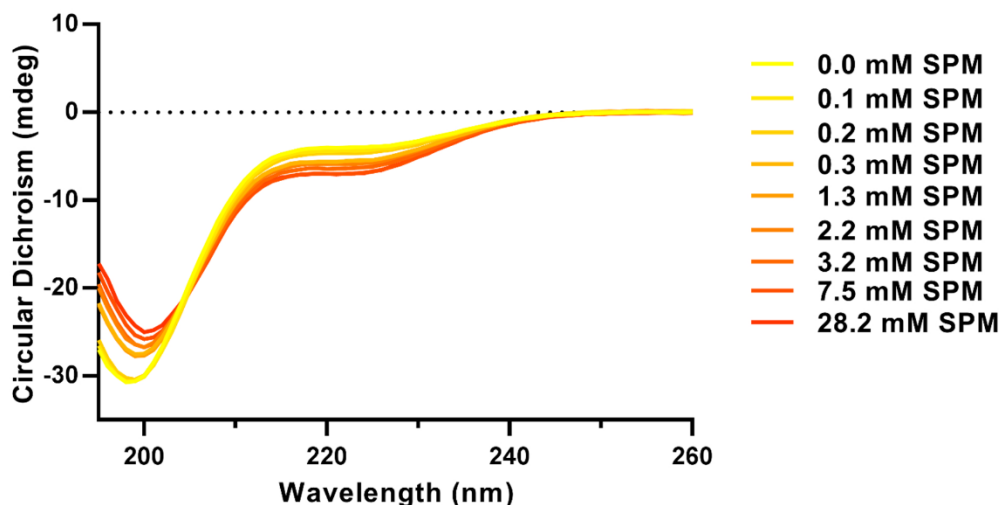**B**

EIEEASVEELTEVPGIGPELAEEILERLAS/E  
 EIEEASVEELTEVPGIGPELAEEILERL

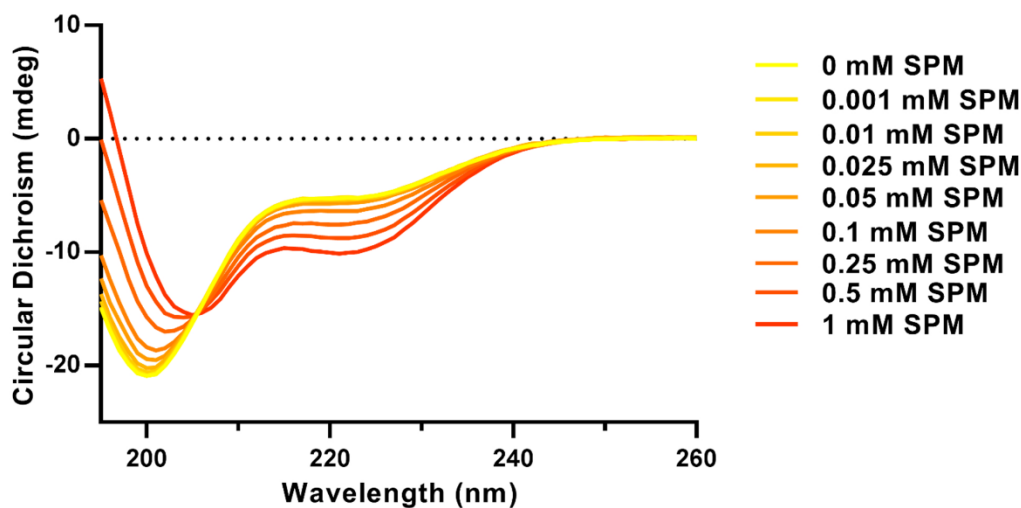

**Figure S2. Spermine titration of acidified Primordial-(HhH)<sub>2</sub>.** Shown are titrations of 5  $\mu$ M protein with spermine (SPM); the protein sequences are shown above the respective titrations graphs. **A.** Complete acidification of Primordial-(HhH)<sub>2</sub> (replacement of all Arg residues to Glu) resulted in an unfolded protein that is only weakly responsive to spermine addition. **B.** Based on previous experience with the (HhH)<sub>2</sub> fold (see *Main Text*) we reverted two positions to arginine (colored blue in the sequence), which resulted in acquisition of an  $\alpha$ -helical structure upon addition of spermine.

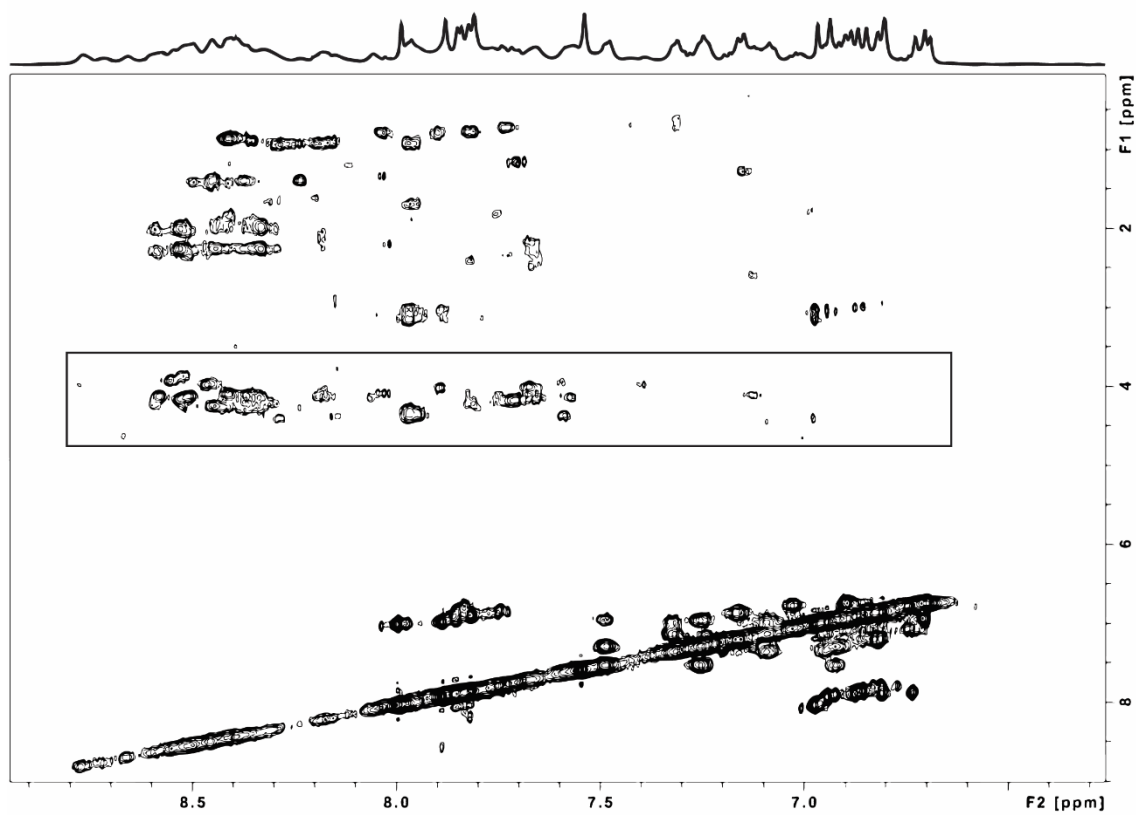

**Figure S3.** A 2D  $^1\text{H}$  NMR TOCSY spectrum of Acidic-(HhH)<sub>2</sub> in the presence of 250 fold excess spermine at 293 K. The spectrum was acquired on a 600 MHz NMR spectrometer using 120-ms mixing time and reports on intra-residue interactions of amide groups with aliphatic groups as well as interactions within aromatic sidechains. The fingerprints region of the spectrum, revealing intra-residue  $^1\text{HN}$ - $^1\text{H}^\alpha$  correlations, is marked with a box (see the main text).

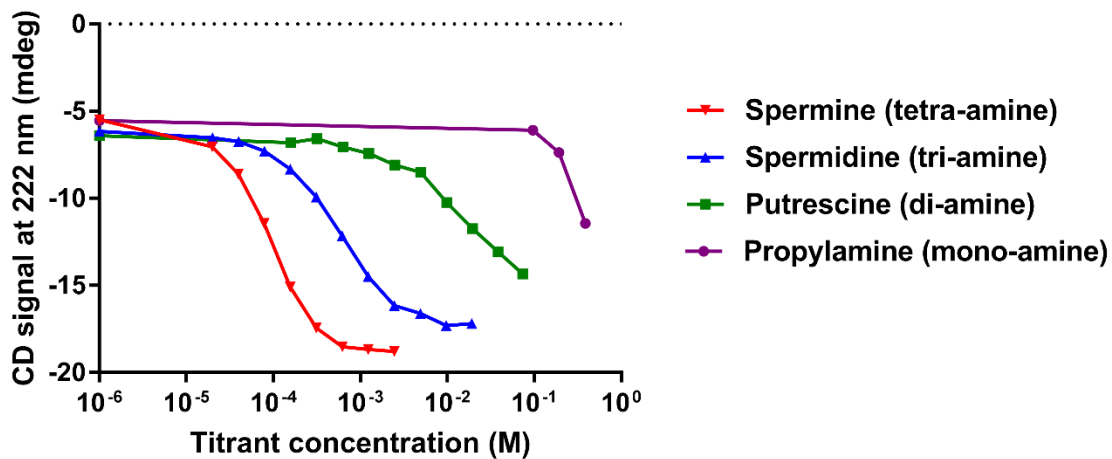

**Figure S4: Titration of Acidic-(HhH)<sub>2</sub> with various polyamines.** Circular dichroism spectra of 10  $\mu$ M Ni-NTA-purified Acidic-(HhH)<sub>2</sub> were collected upon addition of various concentrations of polyamines. Plotted here is the CD signal at 222 nm, a reporter of  $\alpha$ -helical structure, after buffer subtraction and dilution correction. Estimated midpoint concentrations are: spermine = 0.09 mM, spermidine = 0.6 mM, putrescine = 23 mM; these values and the midpoint concentrations from the independent titration in **Figure 5** are within  $\pm 20\%$  (the midpoint for propylamine could not be reliably estimated from this dataset, but the plot is qualitatively very similar to the titration in **Figure 5**). Midpoint values were estimated from a linear interpolation between points and assuming a saturated folded signal of -19 mdeg at 222 nm.

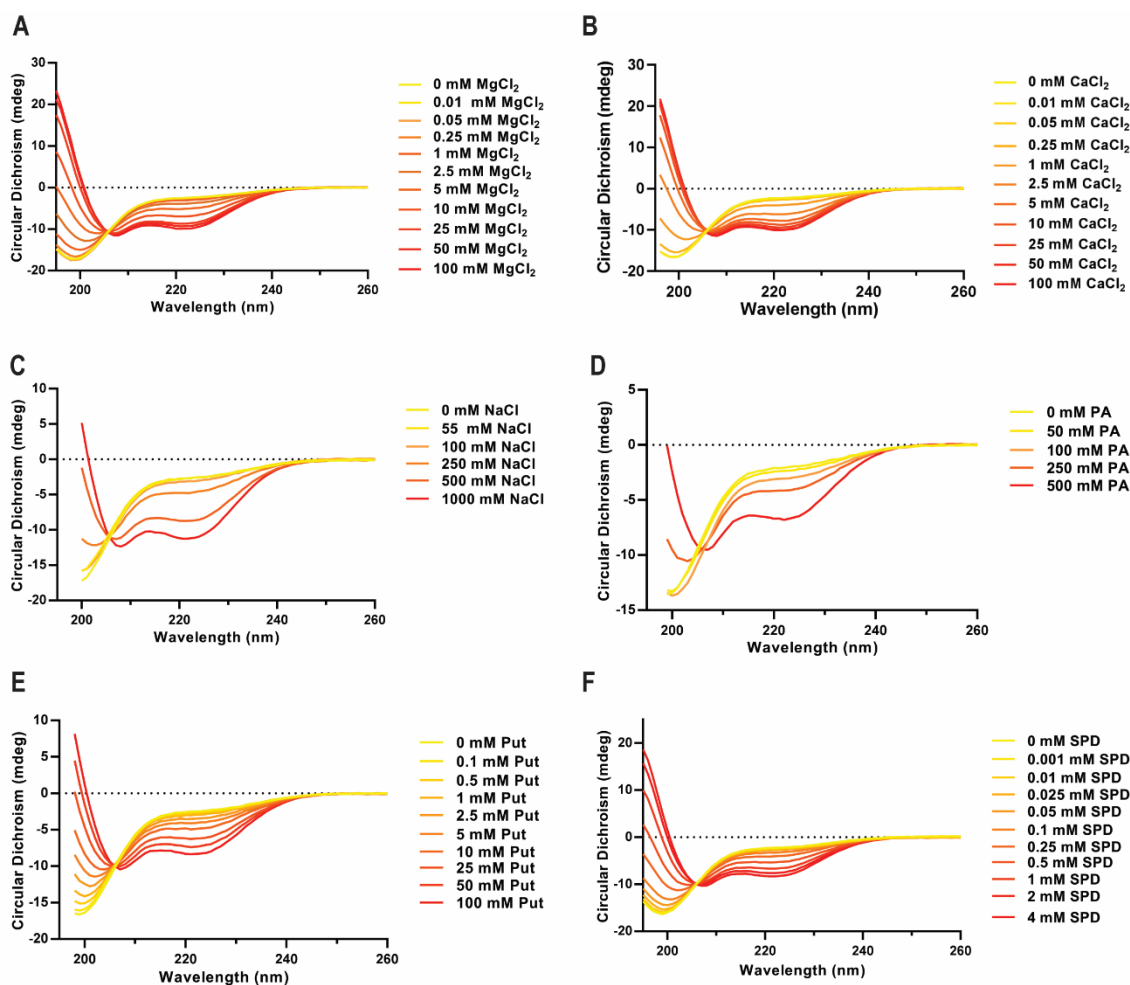

**Figure S5. Circular dichroism spectra of Acidic-(HhH)<sub>2</sub> titrated with salts and polyamines.** Circular dichroism spectra of 5  $\mu$ M Acidic-(HhH)<sub>2</sub> were monitored upon addition of: **A**, MgCl<sub>2</sub>; **B**, CaCl<sub>2</sub>; **C**, NaCl; **D**, propylamine (PA); **E**, putrescine (Put); **F**, spermidine (SPD). Spectra from the titration with spermine are presented in **Figure 3**. Each curve represents the average of two spectra after buffer subtraction and correction for dilution due to titration. Data points exceeding 700 V of applied voltage to the photomultiplier tube (PMT) were discarded. These data were used to generate the titration curves presented in **Figure 5**.
